# Supplementary material for: Independent prognostic role of PD-L1 expression in patients with esophageal squamous cell carcinoma
Source: PubMed Central journal article supplement (PMC5352403; doi:10.18632/oncotarget.14174), 2016-12-26
Supplement: oncotarget-08-8315-s001.pdf [file oncotarget-08-8315-s001.pdf]

## **Independent prognostic role of PD-L1 expression in patients with esophageal squamous cell carcinoma**

### **SUPPLEMENTARY TABLES**

#### **Supplementary Table 1: Correlation of PD-L1 expression with clinicopathological features in all ESCC patients**

See Supplementary File 1.

#### **Supplementary Table 2: Correlation of PD-L1 expression with clinicopathological features in ESCC patients with Stage I-II disease**

See Supplementary File 1.

#### **Supplementary Table 3: Correlation of PD-L1 expression with clinicopathological features in ESCC patients with Stage III-IV disease**

See Supplementary File 1.

#### **Supplementary Table 4: Correlation of PD-L1 expression with clinicopathological features in ESCC patients without lymph node metastasis**

See Supplementary File 1.

#### **Supplementary Table 5: Correlation of PD-L1 expression with clinicopathological features in ESCC patients with lymph node metastasis**

See Supplementary File 1.

#### **Supplementary Table 6: Kaplan–Meier survival analysis for disease free survival and esophageal cancer-specific survival**

See Supplementary File 1.
